# Supplementary material for: Lymphatic Improvement after Suction-assisted Lipectomy in a Lipedema Patient
Source: PubMed Central journal article supplement — Plast Reconstr Surg Glob Open. 2023 Jun 21;11(6):e5097. doi: 10.1097/GOX.0000000000005097 (PMC10284327; doi:10.1097/gox.0000000000005097), 2023-06-21
Supplement: gox-11-e5097-s001.pdf [file gox-11-e5097-s001.pdf]

## Anti-lymphangiogenesis

## Lymphangiogenesis

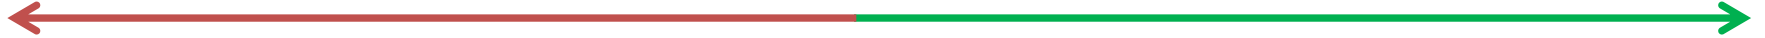

- Direct surgical lymphatic injury
- Acute inflammatory response to surgical trauma
- Irreversible lymphatic damage previous to surgery

- Mechanical decompression of lymphatic vessels
- Decrease in chronic inflammation
- Decreased lymphatic overload
